# Supplementary material for: Inhibition of repaglinide metabolism by letermovir prolonged severe hypoglycemia in a kidney transplant recipient: A case report and literature review
Source: Research Square preprint supplement (doi:10.21203/rs.3.rs-6918162/v1), 2025-08-18
Supplement: Supplementary file 1 [file 4b57114dc15f0b99167f179c.xlsx]

## Sheet: Sheet1
Table 1	Laboratory data and medications taken at the time of transport
Blood cell count			Medications (daily dose)
WBC	900	/μL	TAC-ER	1	mg
Neut	690	/μL	MMF	1000	mg
Hgb	9.4	g/dL	mPSL	4	mg
PLT	8.4 × 104	/μL	VPZ	20	mg
Blood chemistry			MIYA-BM	6	tablets
ALB	4.2	g/dL	RPG	1.5	mg
AST	19	IU/L	LTV	480	mg
ALT	6	IU/L
ALP	98	IU/L
γGTP	24	IU/L
BUN	33.4	mg/dL
Cr	3.11	mg/dL
eGFR	12.6	mL/min/1.73 m2
UA	4.1	mg/dL
Na	138	mEq/L
K	4.5	mEq/L
Cl	105	mEq/L
P	2.1	mg/dL
Ca	9.5	mg/dL
BGL	33	mg/dL
WBC, white blood cell; Neut, neutrophil; Hgb, hemoglobin; PLT, platelet; ALB, albumin; AST, aspartate aminotransferase; ALT, alanine transaminase; ALP, alkaline phosphatase; γGTP, gamma-glutamyl transpeptidase; BUN, blood urea nitrogen; Cr, serum creatinine; eGFR, estimated glomerular filtration rate; UA, uric acid; Na, sodium; K, potassium; Cl, chloride; Ca, calcium; P, phosphorus; TAC-ER, tacro…

## Sheet: Sheet2
服用薬 (用量は1日量で記載): TAC-ER 1 mg，MMF 1000 mg，メチルプレドニゾロン 4mg，ボノプラザン 20mg、ミヤBM 6T，レパグリニド1.5 mg，レテルモビル480 mg
検査所見: SCr 3.11 mg/dL, eGFR 12.6 mL/min, BUN 33.4 mg/dL, AST 19 U/L, ALT 6 U/L, ALP 98 U/L, γ-GTP 24 U/L, Na 138 mEq/L, K 4.5 mEq/L, Cl 105 mEq/L, Ca 9.5 mEq/L, ALB 4.2 g/dL, WBC 900 /µL, Hgb 9.4 g/dL, PLT 84000 /µL
