# Supplementary material for: Inhibition of repaglinide metabolism by letermovir prolonged severe hypoglycemia in a kidney transplant recipient: A case report and literature review
Source: Research Square preprint supplement (doi:10.21203/rs.3.rs-6918162/v1), 2025-08-18
Supplement: Supplementary file 2 [file 8d981daffd9778836dbe6c8e.xlsx]

## Sheet: Sheet1
Table 2	Literature review of repaglinide blood concentration fluctuations mediated by CYP2C8 inhibition
Inhibitor	Daily dose	Effects of exposure to repaglinide	Clinical impact	References
Gemfibrozil	30 mg-900 mg	AUC ↑ 1.8–8.3×, Cmax ↑ 1.4–2.4×	High risk; hypoglycemia possible	[7]
Clopidogrel	75 mg-300 mg	AUC ↑3.9–5.1× , Cmax ↑ 2.0–2.5×	High risk; hypoglycemia possible	[6]
Trimethoprim	400 mg	AUC ↑ 61%, Cmax ↑ 41%	Significant change in healthy subjects	[14]
Deferasirox	30 mg/kg	AUC ↑ 2×, Cmax ↑ 1.5×	Little change in healthy subjects	[15]
Telithromycin	800 mg	AUC ↑ 77%, Cmax ↑ 38%	Significant change in healthy subjects	[16]
